# Supplementary material
Source: PubMed Central journal article supplement (PMC2992947)
Supplement: NIHMS111972-supplement-01.pdf [file NIHMS111972-supplement-01.pdf]

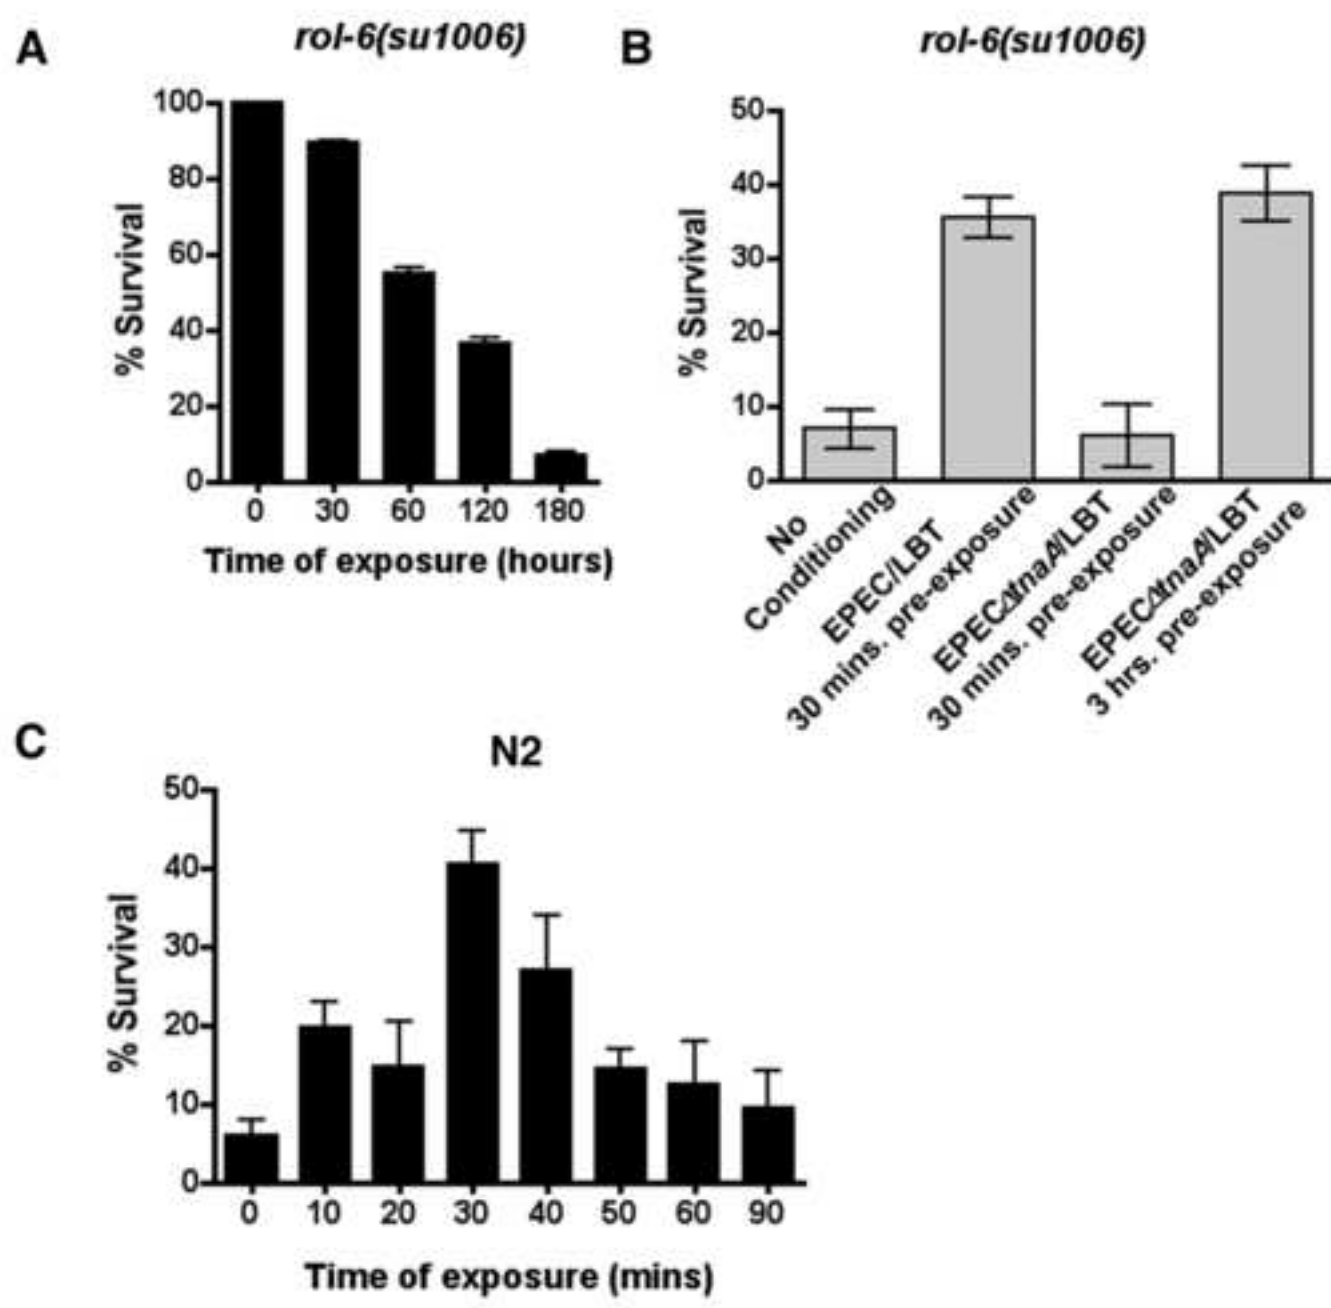

Supplementary Figure 1 (Anyanful et al. 2008)

**A**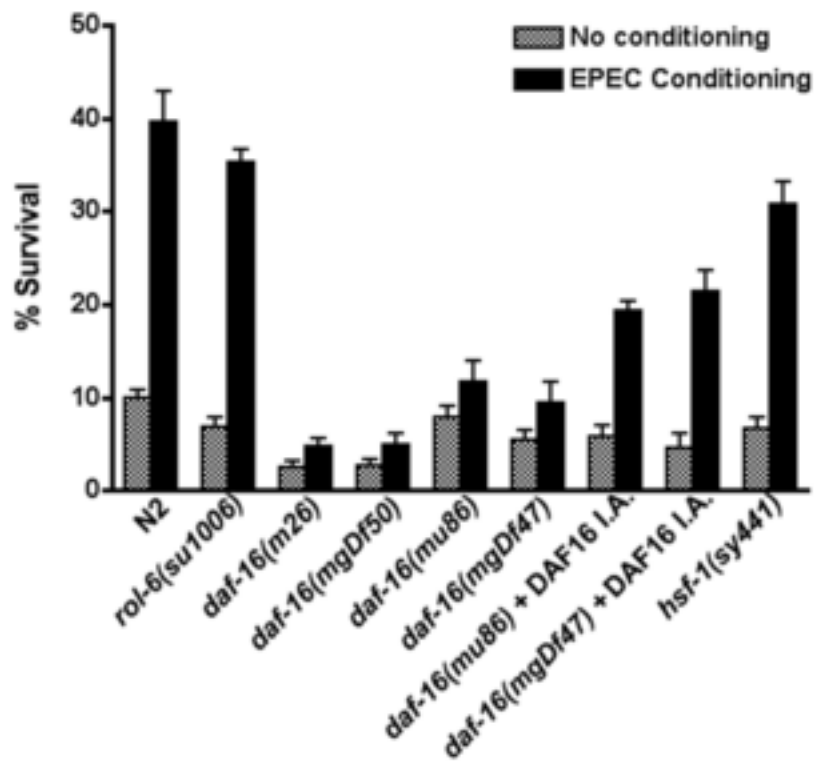**B**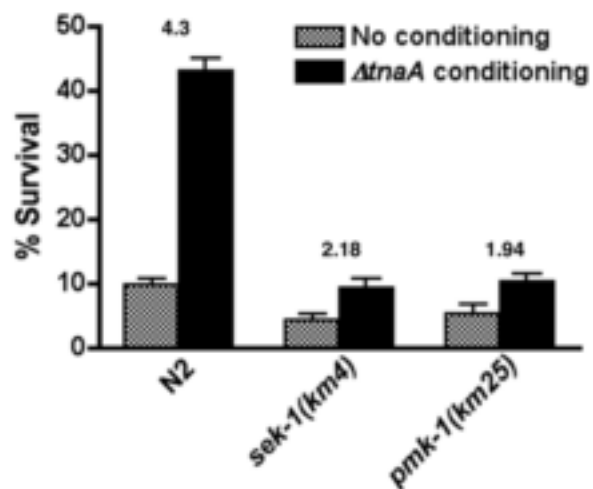**C**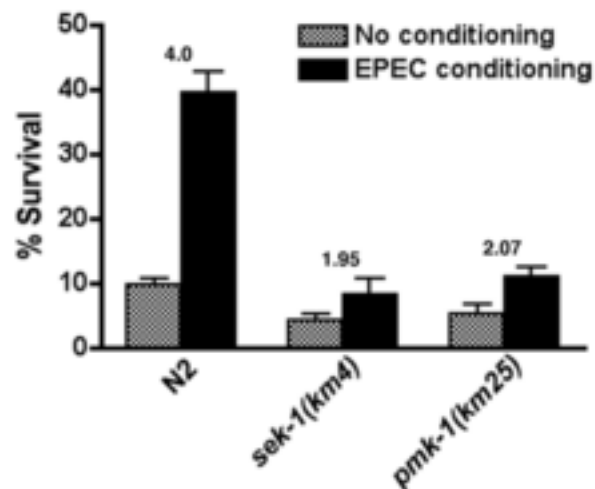

Supplementary Figure 2 (Anyanful et al. 2008)

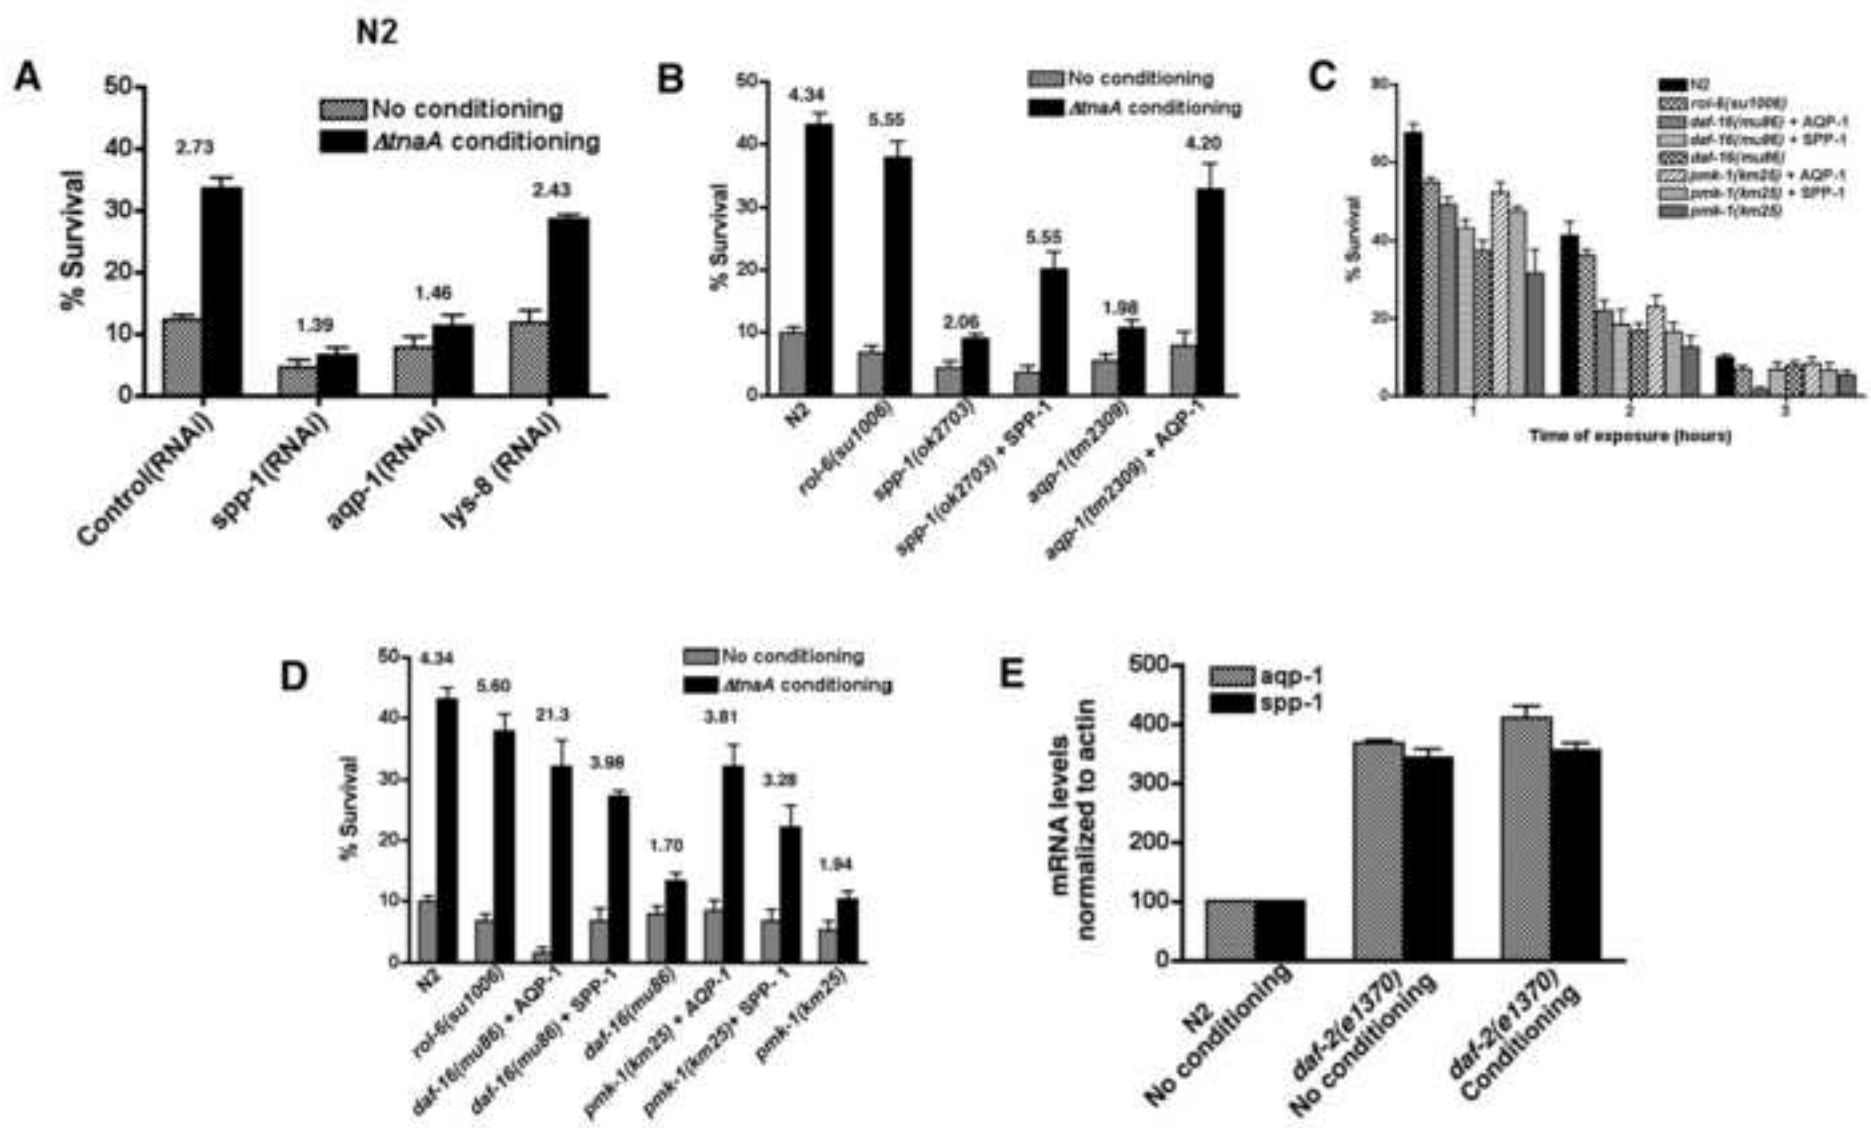

Supplementary Figure 3 (Anyanful et al. 2008)

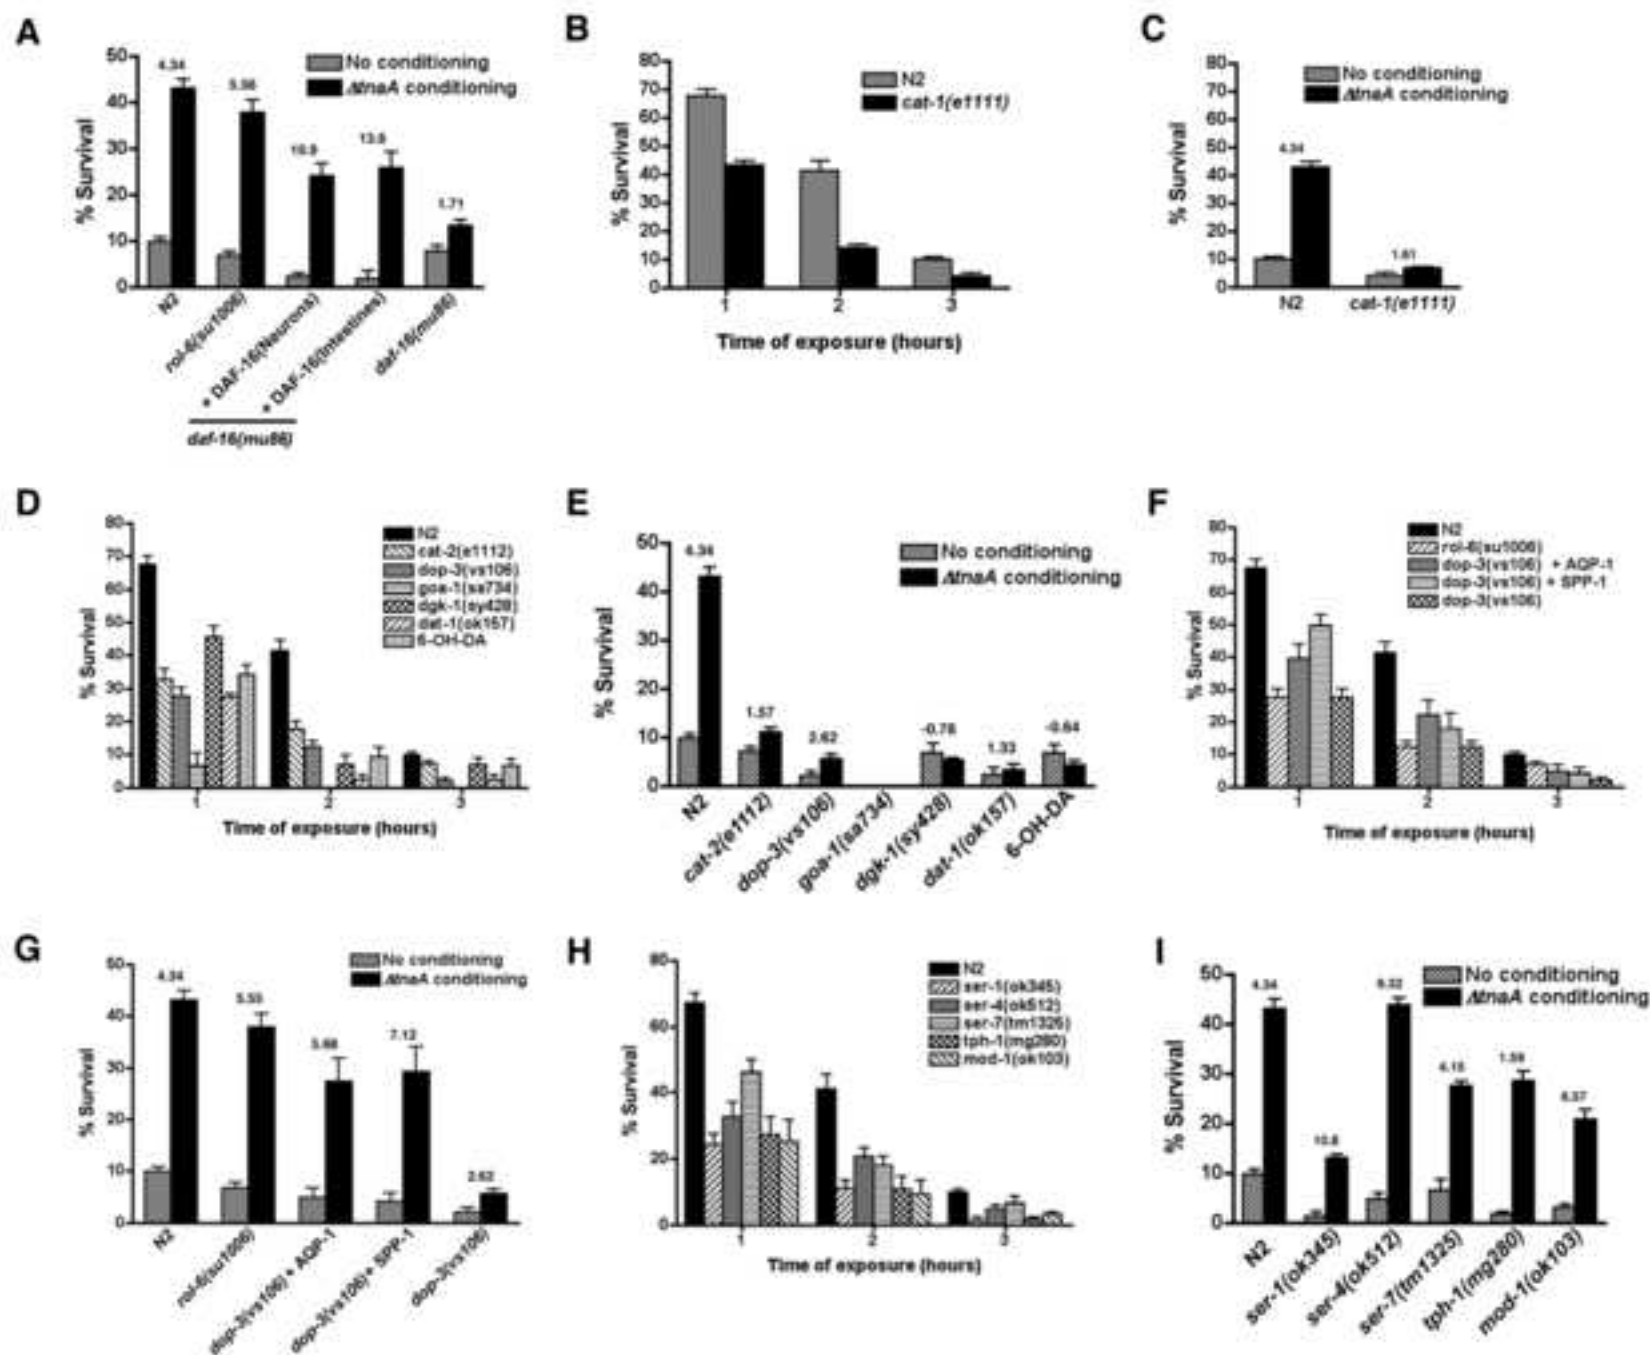

Supplementary Figure 4 (Anyanful et al. 2008)
